1

2

3 **Physiological determinants of the increase in oxygen consumption during exercise**  
 4 **in individuals with stroke**

5

6 **Short title:** Determinants of the increase in oxygen consumption

7

8

9 Kazuaki Oyake<sup>1,2</sup>, Yasuto Baba<sup>2</sup>, Nao Ito<sup>2</sup>, Yuki Suda<sup>2</sup>, Jun Murayama<sup>2</sup>, Ayumi

10 Mochida<sup>2</sup>, Kunitsugu Kondo<sup>2</sup>, Yohei Otaka<sup>2,3</sup>, Kimito Momose<sup>1\*</sup>

11

12

13 <sup>1</sup> Department of Physical Therapy, School of Health Sciences, Shinshu University,

14 Matsumoto, Nagano, Japan

15 <sup>2</sup> Department of Rehabilitation Medicine, Tokyo Bay Rehabilitation Hospital, Narashino,

16 Chiba, Japan

17 <sup>3</sup> Department of Rehabilitation Medicine I, School of Medicine, Fujita Health

18 University, Toyoake, Aichi, Japan

19

20     \* Corresponding author

21     E-mail: [kmomose@shinshu-u.ac.jp](mailto:kmomose@shinshu-u.ac.jp) (KM)

22

## 23 **Abstract**

24 **Background:** Understanding the physiological limitations of the increase in oxygen  
 25 consumption ( $\dot{V}O_2$ ) during exercise is essential to improve cardiorespiratory fitness in  
 26 individuals with stroke. However, the physiological determinants of the increase in  $\dot{V}O_2$   
 27 during exercise have not been examined using multivariate analysis in individuals with  
 28 stroke. This study aimed to identify the physiological determinants of the increase in  
 29  $\dot{V}O_2$  during a graded exercise in terms of the respiratory function, cardiac function, and  
 30 ability of skeletal muscles to extract oxygen.

31 **Methods:** Eighteen individuals with stroke ( $60.1 \pm 9.4$  years of age,  $67.1 \pm 30.8$  days  
 32 poststroke) underwent a graded exercise test for the assessment of cardiorespiratory  
 33 response to exercise. The increase in  $\dot{V}O_2$  from rest to ventilatory threshold and that  
 34 from rest to peak exercise were measured as a dependent variable. The increases in  
 35 respiratory rate, tidal volume, heart rate, stroke volume, and arterial-venous oxygen  
 36 difference from rest to ventilatory threshold and those from rest to peak exercise were  
 37 measured as independent variables.

38 **Results:** From rest to ventilatory threshold, the increases in heart rate ( $\beta = 0.546$ ) and  
 39 arterial-venous oxygen difference ( $\beta = 0.398$ ) were significant determinants of the  
 40 increase in  $\dot{V}O_2$  (adjusted  $R^2 = 0.703$ ,  $p < 0.001$ ). From rest to peak exercise, the

41 increases in tidal volume ( $\beta = 0.611$ ) and heart rate ( $\beta = 0.353$ ) were significant  
 42 determinants of the increase in  $\dot{V}O_2$  (adjusted  $R^2 = 0.702$ ,  $p < 0.001$ ).  
 43 **Conclusion:**  $\dot{V}O_2$  is well-known to increase nearly linearly with increasing heart rate;  
 44 however, our results suggest that arterial-venous oxygen difference and tidal volume are  
 45 also significant physiological determinants of the increase in  $\dot{V}O_2$  from rest to  
 46 ventilatory threshold and that from rest to peak exercise, respectively. Our findings  
 47 could potentially contribute to the development of appropriate therapies to improve  
 48 cardiorespiratory fitness in individuals with stroke.

49

## Introduction

Individuals with stroke have reduced cardiorespiratory fitness compared with age- and sex-matched healthy individuals [1, 2]. Cardiorespiratory fitness reduction is potentially related to walking disability [3, 4], poor cognitive performance [5], and limitations in activities of daily living in individuals with stroke [6-8]. Low levels of cardiorespiratory fitness following stroke may lead to avoidance of physical activity, which causes further deconditioning [9, 10]. Therefore, understanding the physiological limitations of cardiorespiratory fitness in individuals with stroke is essential for the development of appropriate therapies to improve physical activity levels and to prevent further deconditioning.

Oxygen consumption ( $\dot{V}O_2$ ) at ventilatory threshold and that at peak exercise measured during a graded exercise test are used to assess cardiorespiratory fitness in individuals with stroke [1, 11-13]. The physiological factors that potentially limit  $\dot{V}O_2$  at peak exercise are respiratory and cardiac functions to supply oxygen and the ability of skeletal muscles to extract oxygen [12, 14, 15]. In healthy adults,  $\dot{V}O_2$  at peak exercise seems to be limited primarily by cardiac function [14, 15]. Previous studies [12, 16-18] reported that tidal volume, heart rate, and arterial-venous oxygen difference at peak exercise are significantly lower in individuals with stroke than those in age- and

68 sex-matched healthy adults, which may lead to the deterioration of cardiorespiratory  
69 fitness after stroke. Tomczak et al. [18] reported a significant difference between  
70 individuals with stroke and healthy adults in  $\dot{V}O_2$  at peak exercise, but not in  $\dot{V}O_2$  at  
71 rest. Thus, identifying the determinants of the increase in  $\dot{V}O_2$  during exercise  
72 contributes to understanding the physiological limitations of cardiorespiratory fitness in  
73 individuals with stroke. However, the physiological determinants of the increase in  $\dot{V}O_2$   
74 during exercise have not been examined using multivariate analysis in individuals with  
75 stroke.

76 Cross-sectional and longitudinal studies found the relationship between  $\dot{V}O_2$   
77 and arterial-venous oxygen difference at peak exercise in individuals with stroke [17,  
78 19]. Therefore, we hypothesized that arterial-venous oxygen difference is a primary  
79 physiological determinant of the increase in  $\dot{V}O_2$  during exercise in these individuals. In  
80 this study, we aimed to explore the physiological determinants of the increase in  $\dot{V}O_2$   
81 from rest to ventilatory threshold and that from rest to peak exercise in individuals with  
82 stroke.

83

## 84 **Methods**

### 85 **Study design**

86           This study used a cross-sectional observational design. The study protocol was  
87 approved by the appropriate ethics committees of the Tokyo Bay Rehabilitation Hospital  
88 (approval number: 172-2) and the Shinshu University (approval number: 3813). All  
89 participants provided written informed consent prior to study enrollment. The study was  
90 conducted according to the Declaration of Helsinki of 1964, as revised in 2013.

91

### 92 **Participants**

93           Participants were recruited from a convalescent rehabilitation hospital between  
94 November 2017 and November 2018. The inclusion criteria for the study were as  
95 follows: (1) age 40–80 years, (2) being within 180 days after first-ever stroke, (3) ability  
96 to maintain a target cadence of 50 rpm during exercise, and (4) a Mini-Mental State  
97 Examination score [20] of 24 or more. The exclusion criteria were as follows: (1)  
98 limited range of motion and/or pain that could affect the exercise test, (2) unstable  
99 medical conditions such as unstable angina, uncontrolled hypertension, and tachycardia,  
100 (3) use of beta-blocker, and (4) any comorbid neurological disorder.

101

## 102 **Exercise testing**

103           Participants were instructed to refrain from eating for 3 hours and to avoid  
104   caffeine and vigorous physical activity for at least 6 and 24 hours, respectively, before  
105   the exercise test [21]. All participants performed a symptom-limited graded exercise test  
106   on a recumbent cycle ergometer (Strength Ergo 240; Mitsubishi Electric Engineering  
107   Co., Ltd., Tokyo, Japan) that can be precisely load-controlled (coefficient of variation,  
108   5%) over a wide range of pedaling resistance (0-400 W). The distance from the seat  
109   edge to pedal axis was adjusted so that the participant's knee flexion angle was 20°  
110   when extended maximally. The backrest was set at 20° reclined from the vertical  
111   position. Additional strapping was attached to secure the paretic foot to the pedal as  
112   needed. Following a 3-min of rest period (in sitting position) on the recumbent cycle  
113   ergometer to establish a steady state, a warm-up was performed at 0 W for 3 min  
114   followed by 10 W increments every minute [21, 22]. Participants were instructed to  
115   maintain a target cadence of 50 rpm throughout the exercise [21, 22]. Blood pressure  
116   was monitored every minute from the non-paretic arm using an automated system  
117   (Tango; Sun Tech Medical Inc., NC, USA). The test was terminated if the participants  
118   showed signs of angina, dyspnea, inability to maintain cycling cadence more than 40  
119   rpm, hypertension (more than 250 mmHg systolic or more than 115 mmHg diastolic), or



120 drop in systolic blood pressure more than 10 mmHg despite an increase in work load  
 121 [22, 23]. Participants provided their ratings of perceived exertion (6 = no exertion at all,  
 122 20 = maximal exertion) [24] for dyspnea and leg effort at the end of the test. Work rate  
 123 at peak exercise was defined as the peak wattage on test termination [19]. To identify  
 124 whether maximal effort was reached during the exercise test, at least 1 of the following  
 125 criteria had to be met: (1)  $\dot{V}O_2$  increased less than 150 mL·min<sup>-1</sup> for more than 1 min  
 126 despite increased work rate, (2) respiratory exchange ratio achieved greater than 1.10,  
 127 (3) or heart rate achieved 85% of the age-predicted maximal heart rate (220 minus age)  
 128 [23, 25].

129         Physiological variables were measured at rest and continuously during exercise  
 130 test.  $\dot{V}O_2$ , respiratory rate, and tidal volume were measured on a breath-by-breath basis  
 131 using an expired gas analyzer (Aerosonic AT-1100; ANIMA Corp., Tokyo, Japan).  
 132 Carbon dioxide output, the ventilatory equivalents of oxygen and carbon dioxide, and  
 133 the end-tidal oxygen and carbon dioxide fractions were also measured using the expired  
 134 gas analyzer to determine the ventilatory threshold. Heart rate and stroke volume were  
 135 measured on a beat-by-beat basis using a noninvasive impedance cardiography device  
 136 (Task Force Monitor model 3040i; CN Systems Medizintechnik GmbH., Graz, Austria)  
 137 [26-28]. For calculating arterial-venous oxygen difference, measurement values of

138 physiological variables were interpolated to 1-s intervals, time-aligned, and averaged  
139 into 5-s bins [18]. Arterial-venous oxygen difference was calculated as the ratio between  
140  $\dot{V}O_2$  and the product of heart rate and stroke volume.

141         Physiological variables at rest were defined as the average value obtained  
142 during 1 min before exercise onset, and those at peak exercise were defined as the  
143 average value obtained during the last 30 s of exercise test [18, 21]. The ventilatory  
144 threshold was determined using a combination of the following criteria: (1) the point  
145 where the ventilatory equivalent of oxygen reaches its minimum or starts to increase,  
146 without an increase in the ventilatory equivalent of carbon dioxide; (2) the point at  
147 which the end-tidal oxygen fraction reaches a minimum or starts to increase, without a  
148 decline in the end-tidal carbon dioxide fraction; and (3) the point of deflection of carbon  
149 dioxide output versus  $\dot{V}O_2$  [29]. The first two methods were prioritized in case the three  
150 methods presented different results [30, 31]. The ventilatory threshold was determined  
151 as an average based on the values provided by two independent raters (NI and YS),  
152 when the difference in the  $\dot{V}O_2$  values of the corresponding points as determined by the  
153 two raters was less than 100 mL·min<sup>-1</sup> [31, 32]. In case of any discrepancy, a third  
154 experienced rater (KO) judged the point, and the ventilatory threshold was taken as the  
155 average of the two closest values [30, 31].

156

## 157 **Statistical analysis**

158           The G Power computer program version 3.1.9.2 (Heinrich Heine University,  
159 Dusseldorf, Germany) [33] was used to calculate the sample size required for multiple  
160 regression analysis. For multiple regression analyses, if up to five variables (respiratory  
161 rate, tidal volume, heart rate, stroke volume, and arterial-venous oxygen difference) are  
162 modeled at an effect size of 0.49 (very large) at an  $\alpha$  level of 0.05 and power of 0.80, a  
163 minimum of 12 participants are required [33, 34].

164           Normality of distribution was tested using the Shapiro-Wilk test. One-way  
165 repeated-measures analysis of variance or Friedman test with exercise period as a factor  
166 was used to examine whether physiological variables change during exercise. Post hoc  
167 analyses were performed using the Bonferroni multiple comparison test.

168           The increase in  $\dot{V}O_2$  from rest to ventilatory threshold and that from rest to  
169 peak exercise were calculated as the dependent variables. Pearson's product moment  
170 correlation coefficient or Spearman's rank correlation coefficient was used to test the  
171 correlations between the increases from rest to ventilatory threshold in  $\dot{V}O_2$  and other  
172 physiological variables and between the increases from rest to peak exercise in  $\dot{V}O_2$  and  
173 other physiological variables. Those variables that were significantly correlated with the

174 increase in  $\dot{V}O_2$  during exercise testing were then entered into the stepwise multiple  
 175 regression analysis to determine the physiological limitations of the increase in  $\dot{V}O_2$   
 176 with considering multicollinearity. Statistical analyses were performed using the  
 177 Statistical Package for the Social Sciences software version 24.0 (International Business  
 178 Machines Corp., NY, USA). Any p values less than 0.05 were considered statistically  
 179 significant.

180

## 181 **Results**

182 A flow diagram of study participants is shown in Fig 1. Eighteen individuals  
 183 with stroke participated in the study. Table 1 shows the characteristics of the  
 184 participants.

185

186 **Fig 1. Flow diagram of study participants.**

187

188

189

190

191

192

193

194

195 Table 1. Characteristics of participants

| Variable                                        | Value          |
|-------------------------------------------------|----------------|
| Age, years                                      | 60.1 ± 9.4     |
| Sex, male/female                                | 14 (78)/4 (22) |
| Body mass index, kg·m <sup>-2</sup>             | 23.0 ± 3.3     |
| Type of stroke, ischemic/hemorrhage             | 11 (61)/7 (39) |
| Side of motor paresis, right/left               | 8 (44)/10 (56) |
| Time since stroke, days                         | 67.1 ± 30.8    |
| Fugl-Meyer lower extremity motor scores, points | 28.8 ± 7.7     |
| Antihypertensive medications                    |                |
| Angiotensin II receptor blocker                 | 2 (11)         |
| Calcium channel blocker                         | 4 (22)         |
| Comorbidities                                   |                |
| Hypertension                                    | 6 (33)         |
| Diabetes mellitus                               | 4 (22)         |

## Hyperlipidemia

3 (17)

196 Values are presented as mean  $\pm$  SD or number (%).

197

198 No significant adverse events occurred during or after exercise test. All  
199 participants stopped their exercise test due to inability to maintain cycling cadence more  
200 than 40 rpm. In addition, all participants met at least one of the criteria for reaching  
201 maximal effort. Median (interquartile range) values of the ratings of perceived exertion  
202 for dyspnea and leg effort at the end of the test were 13 (13–15) and 15 (13–15),  
203 respectively. Mean  $\pm$  standard deviation of work rate at peak exercise was  $69.4 \pm 30.6$   
204 W.

205 Measurement values at rest, ventilatory threshold, and peak exercise are shown  
206 in Table 2. We observed a main effect of exercise period on all physiological variables  
207 ( $p < 0.001$ ). All physiological variables at ventilatory threshold were significantly  
208 higher than those at rest ( $p < 0.001$ ). From ventilatory threshold to peak exercise,  $\dot{V}O_2$ ,  
209 respiratory rate, tidal volume, and heart rate significantly increased (mean difference =  
210 198.6, 95% confidence interval [CI] = 95.4, 301.7, and  $p < 0.001$ ; mean difference = 7.5,  
211 95% CI = 3.2, 11.7, and  $p < 0.001$ ; mean difference = 0.21, 95% CI = 0.08, 0.33, and  $p$   
212 = 0.002; mean difference = 18.7, 95% CI = 10.2, 21.3, and  $p < 0.001$ , respectively),

213    whereas no significant changes in stroke volume and arterial-venous oxygen difference  
214    were found (mean difference = -1.9, 95% CI = -6.9, 3.0, and  $p = 0.945$ ; mean difference  
215    = 0.74, 95% CI = -0.22, 1.70, and  $p = 0.172$ , respectively).

216 Table 2. Physiological variables at rest, ventilatory threshold, and peak exercise

| Variable                                                   | Rest         | Ventilatory threshold      | Peak exercise                  | p value |
|------------------------------------------------------------|--------------|----------------------------|--------------------------------|---------|
| $\dot{V}O_2$ , mL·min <sup>-1</sup>                        | 253.1 ± 57.7 | 899.7 ± 224.8 <sup>*</sup> | 1098.3 ± 330.3 <sup>†, ‡</sup> | < 0.001 |
| Respiratory rate, breaths·min <sup>-1</sup>                | 18.5 ± 2.8   | 25.2 ± 4.5 <sup>*</sup>    | 32.6 ± 8.5 <sup>†, ‡</sup>     | < 0.001 |
| Tidal volume, L                                            | 0.46 ± 0.11  | 1.07 ± 0.23 <sup>*</sup>   | 1.28 ± 0.30 <sup>†, ‡</sup>    | < 0.001 |
| Heart rate, bpm                                            | 76.0 ± 9.2   | 109.9 ± 13.6 <sup>*</sup>  | 128.6 ± 17.5 <sup>†, ‡</sup>   | < 0.001 |
| Stroke volume, mL                                          | 55.0 ± 7.6   | 73.0 ± 10.4 <sup>*</sup>   | 71.0 ± 9.4 <sup>†</sup>        | < 0.001 |
| Arterial-venous oxygen difference, mL·100 mL <sup>-1</sup> | 6.2 ± 1.6    | 11.2 ± 1.8 <sup>*</sup>    | 12.0 ± 2.4 <sup>†</sup>        | < 0.001 |

217 Values are presented as mean ± SD.

218 A p value represents a significant main effect of exercise period.

219 <sup>\*</sup>, a significant difference between ventilatory threshold and rest (p < 0.001).

220 <sup>†</sup>, a significant difference between peak exercise and rest (p < 0.001).



221 <sup>‡</sup>, a significant difference between peak exercise and ventilatory threshold ( $p < 0.001$ ).

From rest to ventilatory threshold, correlations between the increases in  $\dot{V}O_2$  and other physiological variables are shown in Fig 2. The increase in  $\dot{V}O_2$  was significantly correlated with the increases in tidal volume ( $r = 0.620$ ; 95% CI = 0.215, 0.843; and  $p = 0.006$ ) (Fig 2b), heart rate ( $r = 0.804$ ; 95% CI = 0.540, 0.924; and  $p < 0.001$ ) (Fig 2c), and arterial-venous oxygen difference ( $r = 0.752$ ; 95% CI = 0.440, 0.902; and  $p < 0.001$ ) (Fig 2e). Stepwise multiple regression analysis revealed that the increases in heart rate ( $\beta = 0.546$ ) and arterial-venous oxygen difference ( $\beta = 0.398$ ) were the significant determinants for the increase in  $\dot{V}O_2$  (adjusted  $R^2 = 0.703$ ,  $p < 0.001$ ) (Table 3).

**Fig 2. Correlations between the increases in  $\dot{V}O_2$  and respiratory rate (a),  $\dot{V}O_2$  and tidal volume (b),  $\dot{V}O_2$  and heart rate (c),  $\dot{V}O_2$  and stroke volume (d), and  $\dot{V}O_2$  and arterial-venous oxygen difference (e) from rest to ventilatory threshold.**

241 Table 3. Stepwise multiple regression analysis for identifying the determinants of the increase in  $\dot{V}O_2$  from rest to ventilatory threshold

| Variable                                                                              | $\beta$ | Coefficient | SE    | t value | p value |
|---------------------------------------------------------------------------------------|---------|-------------|-------|---------|---------|
| Increase in heart rate from rest to ventilatory threshold                             | 0.546   | 8.73        | 2.78  | 3.14    | 0.007   |
| Increase in arterial-venous oxygen difference from rest to ventilatory threshold      | 0.398   | 43.03       | 18.82 | 2.29    | 0.037   |
| Constant                                                                              |         | 133.20      | 83.61 | 1.59    | 0.132   |
| F (2, 15) = 21.12, p < 0.001, R <sup>2</sup> = 0.738, Adjusted R <sup>2</sup> = 0.703 |         |             |       |         |         |

242  $\beta$ , standard coefficient; SE, standard error.

From rest to peak exercise, correlations between the increases in  $\dot{V}O_2$  and other physiological variables are shown in Fig 3. The increase in  $\dot{V}O_2$  was significantly correlated with the increases in tidal volume ( $r = 0.806$ ; 95% CI = 0.544, 0.925; and  $p < 0.001$ ) (Fig 3b), heart rate ( $r = 0.691$ ; 95% CI = 0.330, 0.875; and  $p = 0.002$ ) (Fig 3c), and arterial-venous oxygen difference ( $r = 0.729$ ; 95% CI = 0.398, 0.892; and  $p < 0.001$ ) (Fig 3e). Stepwise multiple regression analysis revealed that the increases in tidal volume ( $\beta = 0.611$ ) and heart rate ( $\beta = 0.353$ ) were significant determinants for the increase in  $\dot{V}O_2$  (adjusted  $R^2 = 0.702$ ,  $p < 0.001$ ) (Table 4).

**Fig 3. Correlations between the increases in  $\dot{V}O_2$  and respiratory rate (a),  $\dot{V}O_2$  and tidal volume (b),  $\dot{V}O_2$  and heart rate (c),  $\dot{V}O_2$  and stroke volume (d), and  $\dot{V}O_2$  and arterial-venous oxygen difference (e) from rest to peak exercise.**

262 Table 4. Stepwise multiple regression analysis for identifying the determinants of the increase in  $\dot{V}O_2$  from rest to peak exercise

| Variable                                                             | $\beta$ | Coefficient | SE     | t value | p value |
|----------------------------------------------------------------------|---------|-------------|--------|---------|---------|
| Increase in tidal volume from rest to peak exercise                  | 0.611   | 749.82      | 194.88 | 3.85    | 0.002   |
| Increase in heart rate from rest to peak exercise                    | 0.353   | 6.72        | 3.02   | 2.23    | 0.041   |
| Constant                                                             |         | -117.65     | 155.12 | 0.76    | 0.460   |
| F (2, 15) = 20.99, p < 0.001, $R^2 = 0.737$ , Adjusted $R^2 = 0.702$ |         |             |        |         |         |

263  $\beta$ , standard coefficient: SE, standard error.

## Discussion

This study is the first to explore the physiological determinants of the increase in  $\dot{V}O_2$  during graded exercise in individuals with stroke. From rest to ventilatory threshold, the increases in heart rate and arterial-venous oxygen difference were the significant determinants of the increase in  $\dot{V}O_2$ . From rest to peak exercise, the increases in tidal volume and heart rate were the significant determinants of the increase in  $\dot{V}O_2$ . Physiological impairments in these variables may negatively affect cardiorespiratory fitness in individuals with stroke.

The results of correlation analyses may support previous studies suggesting that impaired tidal volume, heart rate, and arterial-venous oxygen difference at peak exercise limit cardiorespiratory fitness in individuals with stroke [12, 16-18, 31]. Contrary to our hypothesis, only the increase in heart rate was identified as one of the significant determinants of both the increases in  $\dot{V}O_2$  from rest to ventilatory threshold and that from rest to peak exercise, which can be explained by the fact that  $\dot{V}O_2$  increases nearly linearly with increasing heart rate during exercise [35]. Tomczak et al. [18] indicated that the impaired increase in  $\dot{V}O_2$  during exercise in individuals with stroke may be attributed to the impaired increase in heart rate. Our results suggest that cardiac function to supply oxygen rather than the ability of skeletal muscles to extract oxygen affects cardiorespiratory fitness in individuals with stroke. Conversely, Jakovljevic et al. [17] and Moore et al. [19] reported that oxygen extraction

rather than oxygen supply is related with cardiorespiratory fitness in individuals with chronic stroke. The discrepancy in results between the present and previous studies [17, 19] may be caused by the characteristics of participants such as time since stroke.

Skeletal muscle changes after stroke, such as muscle atrophy and shift of muscle fiber type (from type I slow-twitch muscle fibers to type II fast-twitch muscle fibers) particularly in the paretic lower extremity, are observed in individuals with stroke [36]. In addition, impaired vasodilatory function and reduction in blood flow in the paretic lower extremity have also been reported [37, 38]. These changes after stroke may reduce the ability of skeletal muscles to extract oxygen. Reduction in the ability of skeletal muscles to extract oxygen during exercise may increase the dependence of anaerobic glycolysis for energy output, thus increasing the output of lactic acid [39, 40]. Minute ventilation begins to increase exponentially relative to the increase in  $\dot{V}O_2$  to eliminate the excess carbon dioxide produced from bicarbonate buffering of lactic acid, which is defined as ventilatory threshold [41]. These findings support our results that arterial-venous oxygen difference was identified as one of the physiological determinants of the increase in  $\dot{V}O_2$  from rest to ventilatory threshold.

Although arterial-venous oxygen difference increases with incremental exercise, that is assumed to be relatively constant at a submaximal work rate [35]. We observed a significant increase in  $\dot{V}O_2$  but not in arterial-venous oxygen difference from ventilatory

threshold to peak exercise. This may explain the reason why the increase in arterial-venous oxygen difference was not selected as the significant physiological determinant of the increase in  $\dot{V}O_2$  from rest to peak exercise. Our stepwise regression analysis indicated that the increase in tidal volume was a major physiological determinant of the increase in  $\dot{V}O_2$  from rest to peak exercise. Sisante et al. [16] and Tomczak et al. [18] reported that tidal volume and  $\dot{V}O_2$  at peak exercise are significantly lower in individuals with stroke than in healthy controls. Their findings suggest that decreased tidal volume limits the increase in  $\dot{V}O_2$  during exercise. The paralysis of the expiratory muscles on the affected side, decreased motion of the diaphragm, and reduced chest wall excursion may limit the increase in tidal volume during exercise [12, 42].

This study had several limitations. First, all participants were in the subacute stages of recovery from stroke. Therefore, generalization of the findings to individuals with chronic stroke should be made with caution. Second, we used a recumbent cycle ergometer. A treadmill [6], a total-body recumbent steppe [43], a robotics-assisted tilt table [30], and an arm crank ergometer [31] are also used to assess cardiorespiratory fitness in individuals with stroke. Further studies are warranted to examine whether the major physiological determinant of the increase in  $\dot{V}O_2$  during exercise differs with the exercise devices. Finally, as this study used the cross-sectional observational design, the physiological determinants of the temporal changes in  $\dot{V}O_2$  at ventilatory threshold and at peak exercise could not be examined. Further



longitudinal studies are needed to examine whether physiological impairments in tidal volume, heart rate, and arterial-venous oxygen difference affect the temporal changes in  $\dot{V}O_2$  for the development of appropriate therapies to improve cardiorespiratory fitness in individuals with stroke.

## Conclusions

$\dot{V}O_2$  is well-known to increase nearly linearly with increasing heart rate [35, 41]; however our results suggest that arterial-venous oxygen difference and tidal volume are also significant physiological determinants of increase in  $\dot{V}O_2$  from rest to ventilatory threshold and that from rest to peak exercise, respectively. Our findings could potentially contribute to the development of appropriate therapies to improve cardiorespiratory fitness in individuals with stroke.

## Acknowledgments

The authors certify that no other persons have made substantial contributions to this manuscript.

## References

1. Smith AC, Saunders DH, Mead G. Cardiorespiratory fitness after stroke: a systematic review. *Int J Stroke*. 2012;7(6):499-510. Epub 2012/05/09. doi: 10.1111/j.1747-4949.2012.00791.x. PubMed PMID: 22568786.
2. Dunn A, Marsden DL, Van Vliet P, Spratt NJ, Callister R. Independently ambulant, community-dwelling stroke survivors have reduced cardiorespiratory fitness, mobility and knee strength compared to an age- and gender-matched cohort. *Top Stroke Rehabil*. 2017;24(3):163-9. Epub 2016/09/28. doi: 10.1080/10749357.2016.1236482. PubMed PMID: 27670905.
3. Kelly JO, Kilbreath SL, Davis GM, Zeman B, Raymond J. Cardiorespiratory fitness and walking ability in subacute stroke patients. *Arch Phys Med Rehabil*. 2003;84(12):1780-5. PubMed PMID: 14669183.
4. Patterson SL, Forrester LW, Rodgers MM, Ryan AS, Ivey FM, Sorkin JD, et al. Determinants of walking function after stroke: differences by deficit severity. *Arch Phys Med Rehabil*. 2007;88(1):115-9. doi: 10.1016/j.apmr.2006.10.025. PubMed PMID: 17207686.
5. Boss HM, Van Schaik SM, Witkamp TD, Geerlings MI, Weinstein HC, Van den Berg-Vos RM. Cardiorespiratory fitness, cognition and brain structure after TIA or minor ischemic stroke. *Int J Stroke*. 2017;12(7):724-31. Epub 2017/04/06. doi: 10.1177/1747493017702666. PubMed PMID: 28382852.

- 358 6. Mackay-Lyons MJ, Makrides L. Exercise capacity early after stroke. Arch Phys Med  
359 Rehabil. 2002;83(12):1697-702. doi: 10.1053/apmr.2002.36395. PubMed PMID: 12474172.
- 360 7. Ivey FM, Macko RF, Ryan AS, Hafer-Macko CE. Cardiovascular health and fitness  
361 after stroke. Top Stroke Rehabil. 2005;12(1):1-16. doi: 10.1310/GEEU-YRUY-VJ72-LEAR.  
362 PubMed PMID: 15735997.
- 363 8. Kim BR, Han EY, Joo SJ, Kim SY, Yoon HM. Cardiovascular fitness as a predictor  
364 of functional recovery in subacute stroke patients. Disabil Rehabil. 2014;36(3):227-31. Epub  
365 2013/04/17. doi: 10.3109/09638288.2013.787123. PubMed PMID: 23594057.
- 366 9. Thilarajah S, Mentiplay BF, Bower KJ, Tan D, Pua YH, Williams G, et al. Factors  
367 associated with post-stroke physical activity: a systematic review and meta-analysis. Arch  
368 Phys Med Rehabil. 2018;99(9):1876-89. Epub 2017/10/19. doi: 10.1016/j.apmr.2017.09.117.  
369 PubMed PMID: 29056502.
- 370 10. Saunders DH, Greig CA, Mead GE. Physical activity and exercise after stroke:  
371 review of multiple meaningful benefits. Stroke. 2014;45(12):3742-7. Epub 2014/11/04. doi:  
372 10.1161/STROKEAHA.114.004311. PubMed PMID: 25370588.
- 373 11. Boyne P, Reisman D, Brian M, Barney B, Franke A, Carl D, et al. Ventilatory  
374 threshold may be a more specific measure of aerobic capacity than peak oxygen consumption  
375 rate in persons with stroke. Top Stroke Rehabil. 2017;24(2):149-57. Epub 2016/07/25. doi:  
376 10.1080/10749357.2016.1209831. PubMed PMID: 27454553; PubMed Central PMCID:

- 377 PMCPMC5588902.
- 378 12. Billinger SA, Coughenour E, Mackay-Lyons MJ, Ivey FM. Reduced  
379 cardiorespiratory fitness after stroke: biological consequences and exercise-induced  
380 adaptations. *Stroke Res Treat*. 2012;2012:959120. Epub 2011/08/14. doi:  
381 10.1155/2012/959120. PubMed PMID: 21876848; PubMed Central PMCID:  
382 PMCPMC3159380.
- 383 13. Saunders DH, Sanderson M, Hayes S, Kilrane M, Greig CA, Brazzelli M, et al.  
384 Physical fitness training for stroke patients. *Cochrane Database Syst Rev*. 2016;3:CD003316.  
385 Epub 2016/03/24. doi: 10.1002/14651858.CD003316.pub6. PubMed PMID: 27010219.
- 386 14. Richardson RS, Harms CA, Grassi B, Hepple RT. Skeletal muscle: master or slave of  
387 the cardiovascular system? *Med Sci Sports Exerc*. 2000;32(1):89-93. Epub 2000/01/27.  
388 PubMed PMID: 10647534.
- 389 15. Bassett DR, Howley ET. Limiting factors for maximum oxygen uptake and  
390 determinants of endurance performance. *Med Sci Sports Exerc*. 2000;32(1):70-84. PubMed  
391 PMID: 10647532.
- 392 16. Sisante JF, Matlaga AE, Arena R, Rippee MA, Billinger SA. Decreased tidal  
393 volume may limit cardiopulmonary performance during exercise in subacute stroke. *J*  
394 *Cardiopulm Rehabil Prev*. 2015;35(5):334-41. doi: 10.1097/HCR.000000000000119.  
395 PubMed PMID: 26034936; PubMed Central PMCID: PMCPMC4552576.

- 396 17. Jakovljevic DG, Moore SA, Tan LB, Rochester L, Ford GA, Trenell MI.  
397 Discrepancy between cardiac and physical functional reserves in stroke. *Stroke*.  
398 2012;43(5):1422-5. Epub 2012/02/23. doi: 10.1161/STROKEAHA.111.649434. PubMed  
399 PMID: 22363066.
- 400 18. Tomczak CR, Jelani A, Haennel RG, Haykowsky MJ, Welsh R, Manns PJ. Cardiac  
401 reserve and pulmonary gas exchange kinetics in patients with stroke. *Stroke*.  
402 2008;39(11):3102-6. Epub 2008/08/14. doi: 10.1161/STROKEAHA.108.515346. PubMed  
403 PMID: 18703810.
- 404 19. Moore SA, Jakovljevic DG, Ford GA, Rochester L, Trenell MI. Exercise induces  
405 peripheral muscle but not cardiac adaptations after stroke: a randomized controlled pilot trial.  
406 *Arch Phys Med Rehabil*. 2016;97(4):596-603. Epub 2016/01/04. doi:  
407 10.1016/j.apmr.2015.12.018. PubMed PMID: 26763949; PubMed Central PMCID:  
408 PMCPMC5813708.
- 409 20. Folstein MF, Folstein SE, McHugh PR. "Mini-mental state". A practical method for  
410 grading the cognitive state of patients for the clinician. *J Psychiatr Res*. 1975;12(3):189-98.  
411 PubMed PMID: 1202204.
- 412 21. van de Port IG, Kwakkel G, Wittink H. Systematic review of cardiopulmonary  
413 exercise testing post stroke: Are we adhering to practice recommendations? *J Rehabil Med*.  
414 2015;47(10):881-900. doi: 10.2340/16501977-2031. PubMed PMID: 26551052.

- 415 22. Tseng BY, Kluding P. The relationship between fatigue, aerobic fitness, and motor  
416 control in people with chronic stroke: a pilot study. *J Geriatr Phys Ther.* 2009;32(3):97-102.  
417 PubMed PMID: 20128333; PubMed Central PMCID: PMC4353495.
- 418 23. Fletcher GF, Ades PA, Kligfield P, Arena R, Balady GJ, Bittner VA, et al. Exercise  
419 standards for testing and training: a scientific statement from the American Heart Association.  
420 *Circulation.* 2013;128(8):873-934. Epub 2013/07/24. doi: 10.1161/CIR.0b013e31829b5b44.  
421 PubMed PMID: 23877260.
- 422 24. Borg GA. Psychophysical bases of perceived exertion. *Med Sci Sports Exerc.*  
423 1982;14(5):377-81. PubMed PMID: 7154893.
- 424 25. Wittink H, Verschuren O, Terwee C, de Groot J, Kwakkel G, van de Port I.  
425 Measurement properties of maximal cardiopulmonary exercise tests protocols in persons after  
426 stroke: A systematic review. *J Rehabil Med.* 2017;49(9):689-99. doi: 10.2340/16501977-2260.  
427 PubMed PMID: 28862313.
- 428 26. Charloux A, Lonsdorfer-Wolf E, Richard R, Lampert E, Oswald-Mammoser M,  
429 Mettauer B, et al. A new impedance cardiograph device for the non-invasive evaluation of  
430 cardiac output at rest and during exercise: comparison with the "direct" Fick method. *Eur J*  
431 *Appl Physiol.* 2000;82(4):313-20. doi: 10.1007/s004210000226. PubMed PMID: 10958374.
- 432 27. Richard R, Lonsdorfer-Wolf E, Charloux A, Doutreleau S, Buchheit M,  
433 Oswald-Mammoser M, et al. Non-invasive cardiac output evaluation during a maximal

434 progressive exercise test, using a new impedance cardiograph device. *Eur J Appl Physiol.*  
 435 2001;85(3-4):202-7. doi: 10.1007/s004210100458. PubMed PMID: 11560071.

436 28. Fortin J, Habenbacher W, Heller A, Hacker A, Grullenberger R, Innerhofer J, et al.  
 437 Non-invasive beat-to-beat cardiac output monitoring by an improved method of transthoracic  
 438 bioimpedance measurement. *Comput Biol Med.* 2006;36(11):1185-203. Epub 2005/08/29.  
 439 doi: 10.1016/j.compbiomed.2005.06.001. PubMed PMID: 16131462.

440 29. Binder RK, Wonisch M, Corra U, Cohen-Solal A, Vanhees L, Saner H, et al.  
 441 Methodological approach to the first and second lactate threshold in incremental  
 442 cardiopulmonary exercise testing. *Eur J Cardiovasc Prev Rehabil.* 2008;15(6):726-34. doi:  
 443 10.1097/HJR.0b013e328304fed4. PubMed PMID: 19050438.

444 30. Saengsuwan J, Berger L, Schuster-Amft C, Nef T, Hunt KJ. Test-retest reliability and  
 445 four-week changes in cardiopulmonary fitness in stroke patients: evaluation using a  
 446 robotics-assisted tilt table. *BMC Neurol.* 2016;16(1):163. Epub 2016/09/06. doi:  
 447 10.1186/s12883-016-0686-0. PubMed PMID: 27600918; PubMed Central PMCID:  
 448 PMCPMC5012058.

449 31. Oyake K, Yamaguchi T, Oda C, Kudo D, Kondo K, Otaka Y, et al. Unilateral arm  
 450 crank exercise test for assessing cardiorespiratory fitness in individuals with hemiparetic  
 451 stroke. *Biomed Res Int.* 2017;2017:6862041. Epub 2017/12/31. doi: 10.1155/2017/6862041.  
 452 PubMed PMID: 29457034; PubMed Central PMCID: PMCPMC5804117.

- 453 32. Bosch PR, Holzapfel S, Traustadottir T. Feasibility of Measuring Ventilatory  
454 Threshold in Adults With Stroke-Induced Hemiparesis: Implications for Exercise Prescription.  
455 Arch Phys Med Rehabil. 2015;96(10):1779-84. Epub 2015/05/12. doi:  
456 10.1016/j.apmr.2015.04.023. PubMed PMID: 25979162.
- 457 33. Erdfelder E, Faul F, Buchner A. GPOWER: A general power analysis program.  
458 Behav Res Methods. 1996;28(1):1-11. doi: 10.3758/bf03203630.
- 459 34. Maher JM, Markey JC, Ebert-May D. The other half of the story: effect size analysis  
460 in quantitative research. CBE Life Sci Educ. 2013;12(3):345-51. Epub 2013/09/06. doi:  
461 10.1187/cbe.13-04-0082. PubMed PMID: 24006382; PubMed Central PMCID:  
462 PMCPMC3763001.
- 463 35. American Thoracic Society and American College of Chest Physicians. ATS/ACCP  
464 Statement on cardiopulmonary exercise testing. Am J Respir Crit Care Med.  
465 2003;167(2):211-77. doi: 10.1164/rccm.167.2.211. PubMed PMID: 12524257.
- 466 36. Coelho Junior HJ, Gambassi BB, Diniz TA, Fernandes IM, Caperuto É, Uchida MC,  
467 et al. Inflammatory mechanisms associated with skeletal muscle sequelae after stroke: role of  
468 physical exercise. Mediators Inflamm. 2016;2016:3957958. Epub 2016/08/28. doi:  
469 10.1155/2016/3957958. PubMed PMID: 27647951; PubMed Central PMCID:  
470 PMCPMC5018330.
- 471 37. Ivey FM, Hafer-Macko CE, Ryan AS, Macko RF. Impaired leg vasodilatory function



472 after stroke: adaptations with treadmill exercise training. *Stroke*. 2010;41(12):2913-7. Epub  
 473 2010/10/21. doi: 10.1161/STROKEAHA.110.599977. PubMed PMID: 20966405; PubMed  
 474 Central PMCID: PMCPMC3748932.

475 38. Billinger SA, Kluding PM. Use of Doppler ultrasound to assess femoral artery  
 476 adaptations in the hemiparetic limb in people with stroke. *Cerebrovasc Dis*. 2009;27(6):552-8.  
 477 Epub 2009/04/24. doi: 10.1159/000214218. PubMed PMID: 19390180.

478 39. Bogdanis GC. Effects of physical activity and inactivity on muscle fatigue. *Front*  
 479 *Physiol*. 2012;3:142. Epub 2012/05/18. doi: 10.3389/fphys.2012.00142. PubMed PMID:  
 480 22629249; PubMed Central PMCID: PMCPMC3355468.

481 40. Ivy JL, Withers RT, Van Handel PJ, Elger DH, Costill DL. Muscle respiratory  
 482 capacity and fiber type as determinants of the lactate threshold. *J Appl Physiol Respir*  
 483 *Environ Exerc Physiol*. 1980;48(3):523-7. Epub 1980/03/01. doi:  
 484 10.1152/jappl.1980.48.3.523. PubMed PMID: 7372524.

485 41. Balady GJ, Arena R, Sietsema K, Myers J, Coke L, Fletcher GF, et al. Clinician's  
 486 Guide to cardiopulmonary exercise testing in adults: a scientific statement from the American  
 487 Heart Association. *Circulation*. 2010;122(2):191-225. Epub 2010/06/28. doi:  
 488 10.1161/CIR.0b013e3181e52e69. PubMed PMID: 20585013.

489 42. Lanini B, Bianchi R, Romagnoli I, Coli C, Binazzi B, Gigliotti F, et al. Chest wall  
 490 kinematics in patients with hemiplegia. *Am J Respir Crit Care Med*. 2003;168(1):109-13.

491 Epub 2003/04/24. doi: 10.1164/rccm.200207-745OC. PubMed PMID: 12714347.

492 43. Billinger SA, Tseng BY, Kluding PM. Modified total-body recumbent stepper

493 exercise test for assessing peak oxygen consumption in people with chronic stroke. Phys Ther.

494 2008;88(10):1188-95. Epub 2008/09/04. doi: 10.2522/ptj.20080072. PubMed PMID:

495 18772275; PubMed Central PMCID: PMCPMC2557055.

496

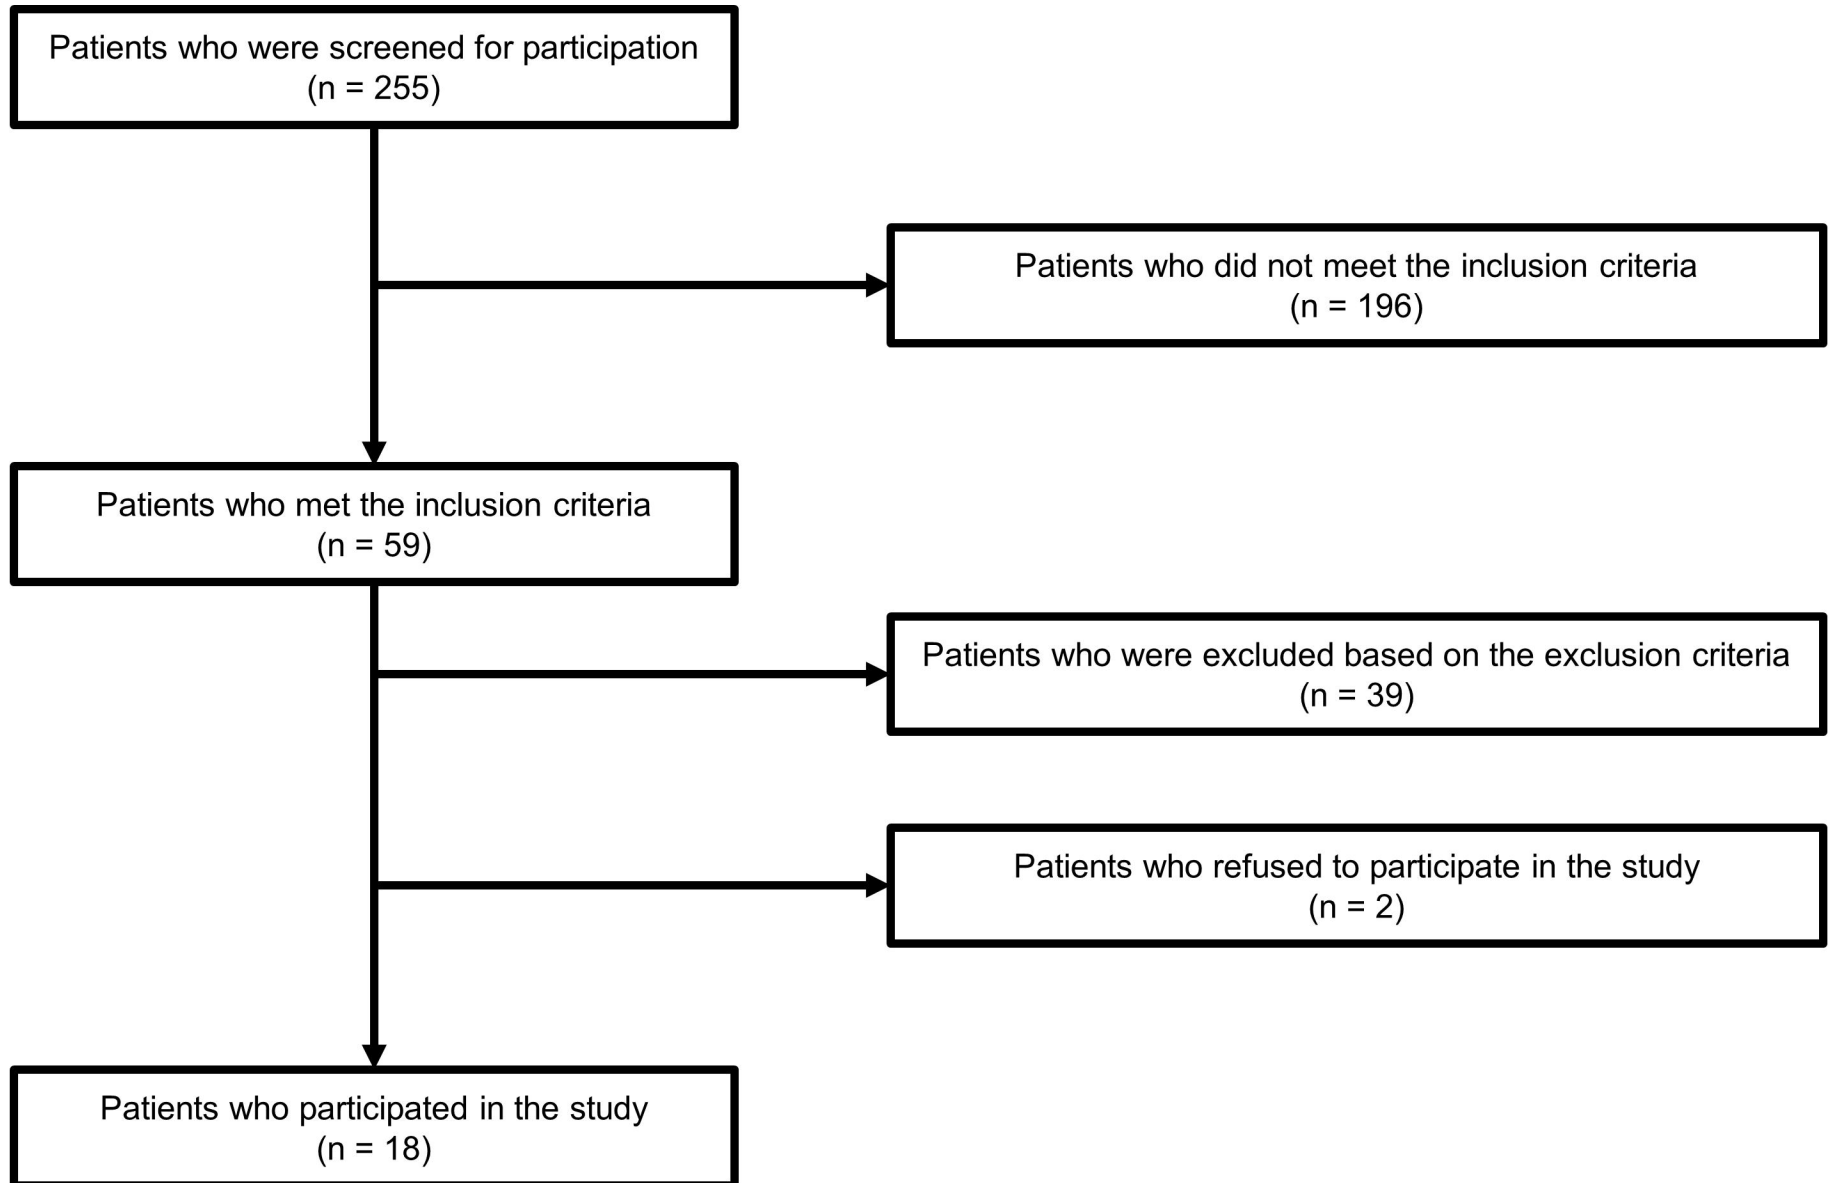

a

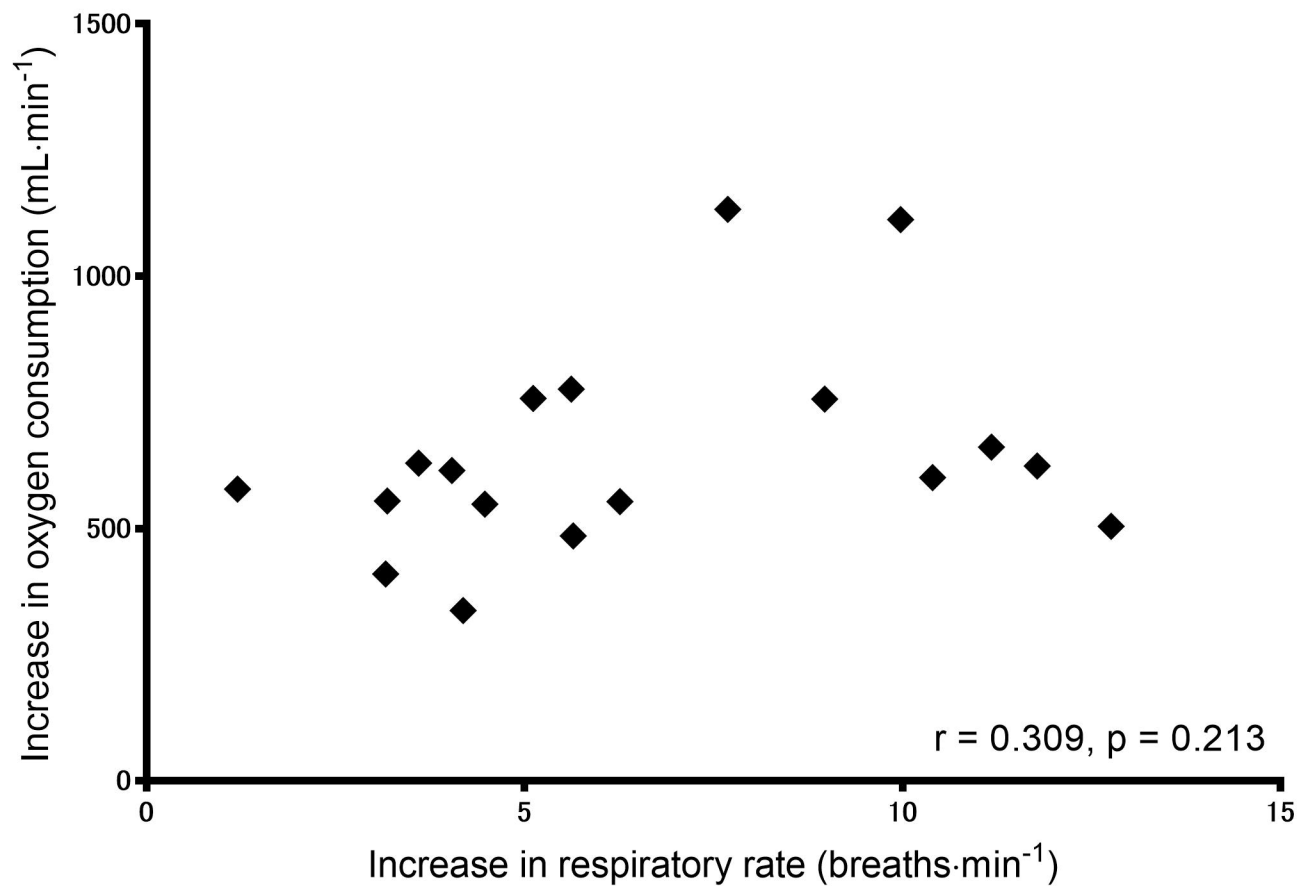

b

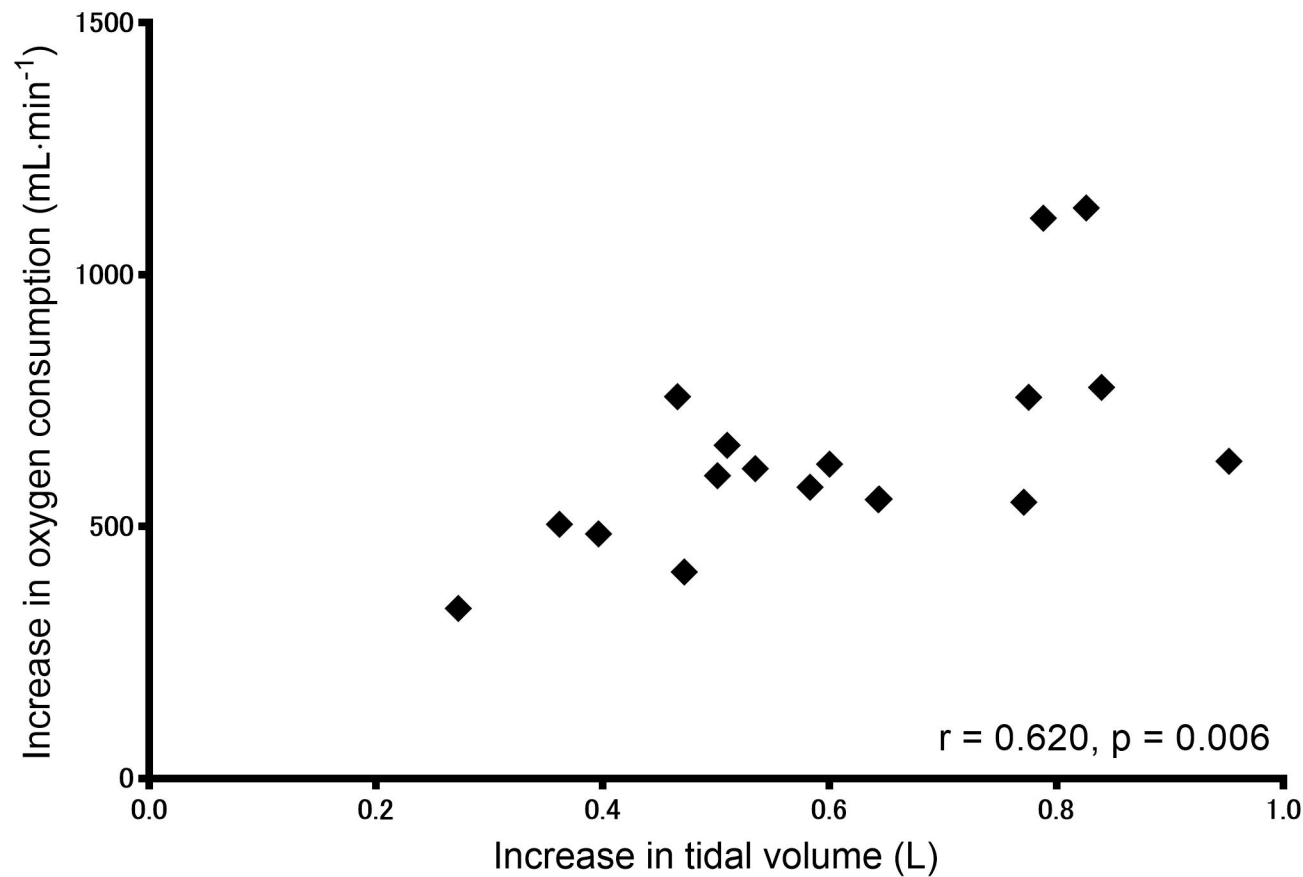

C

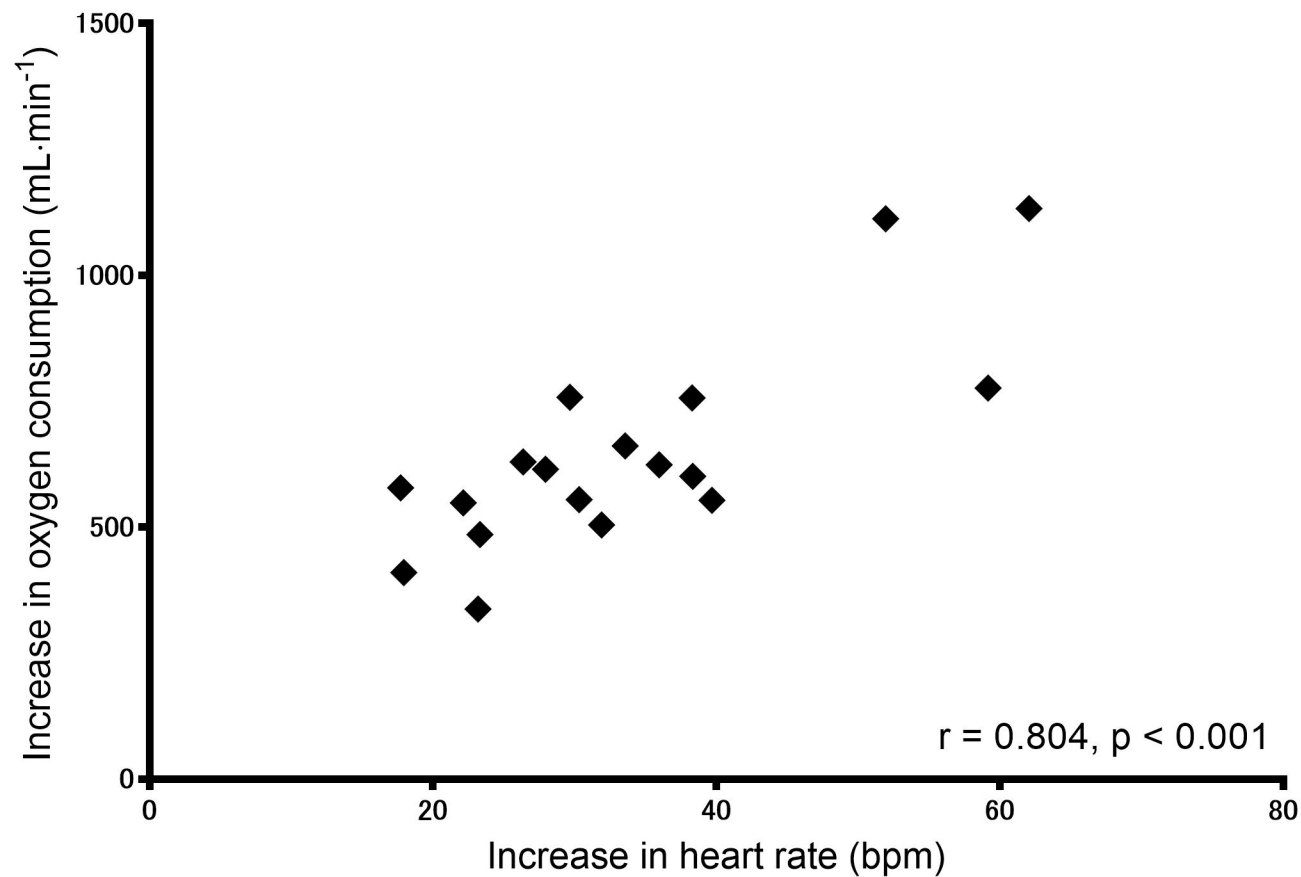

d

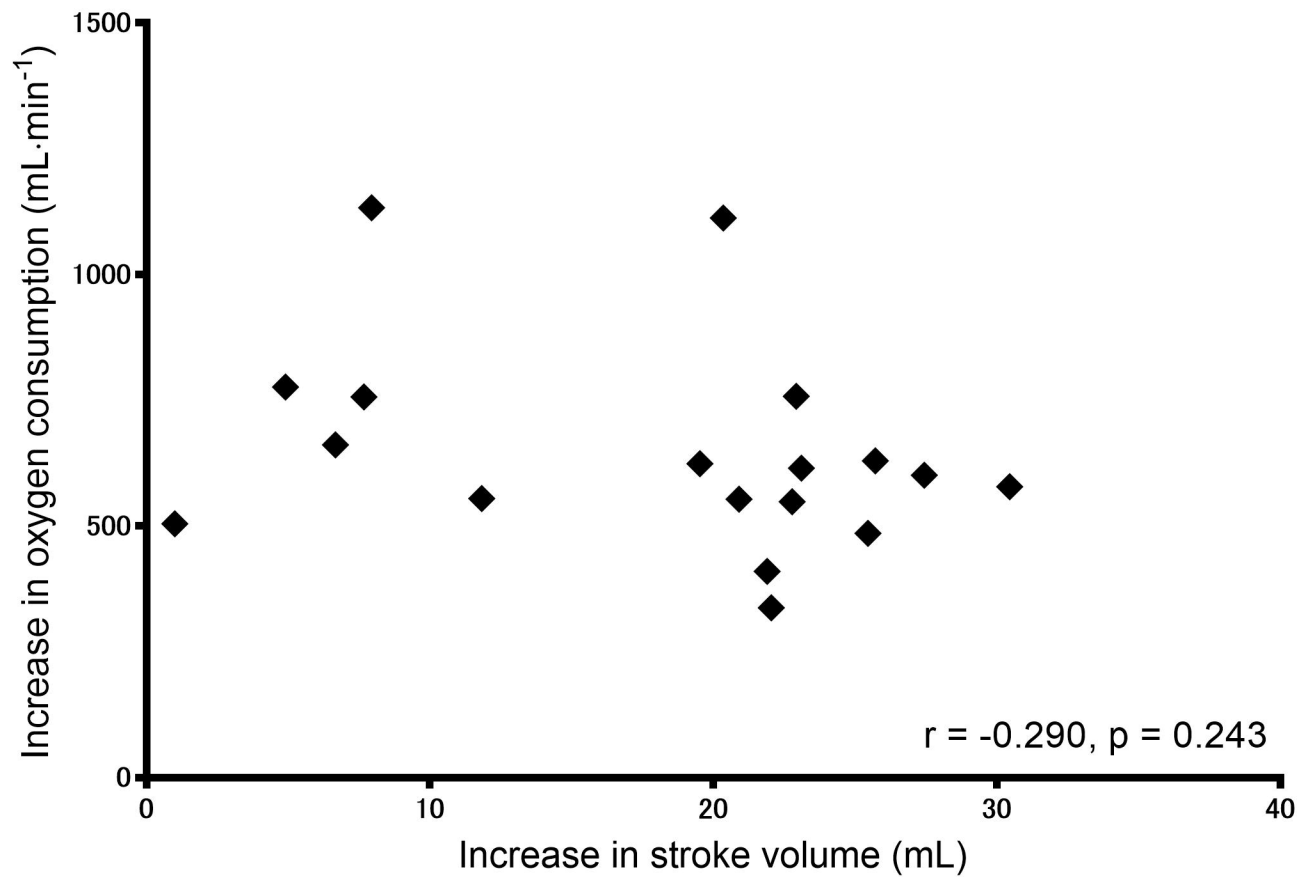

①

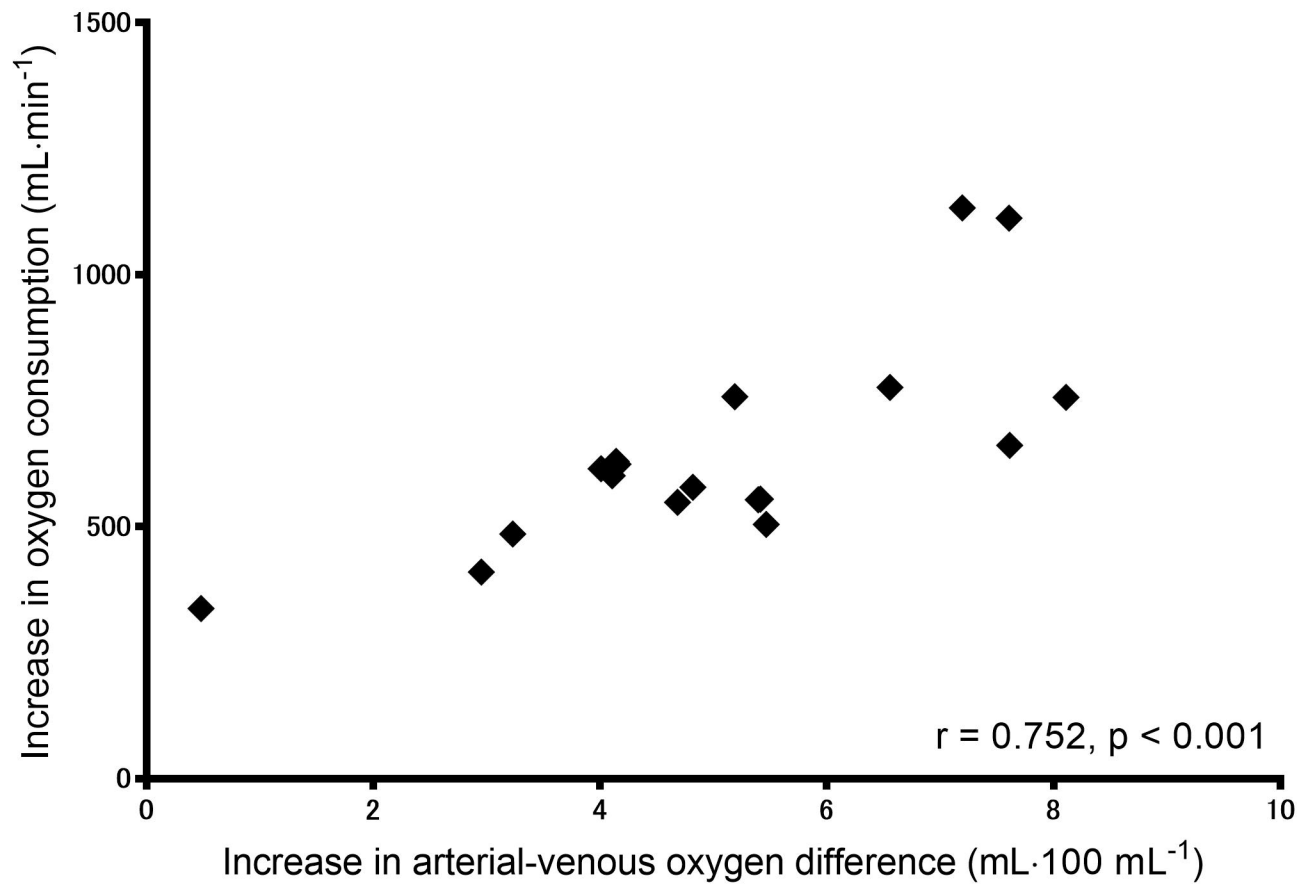



a

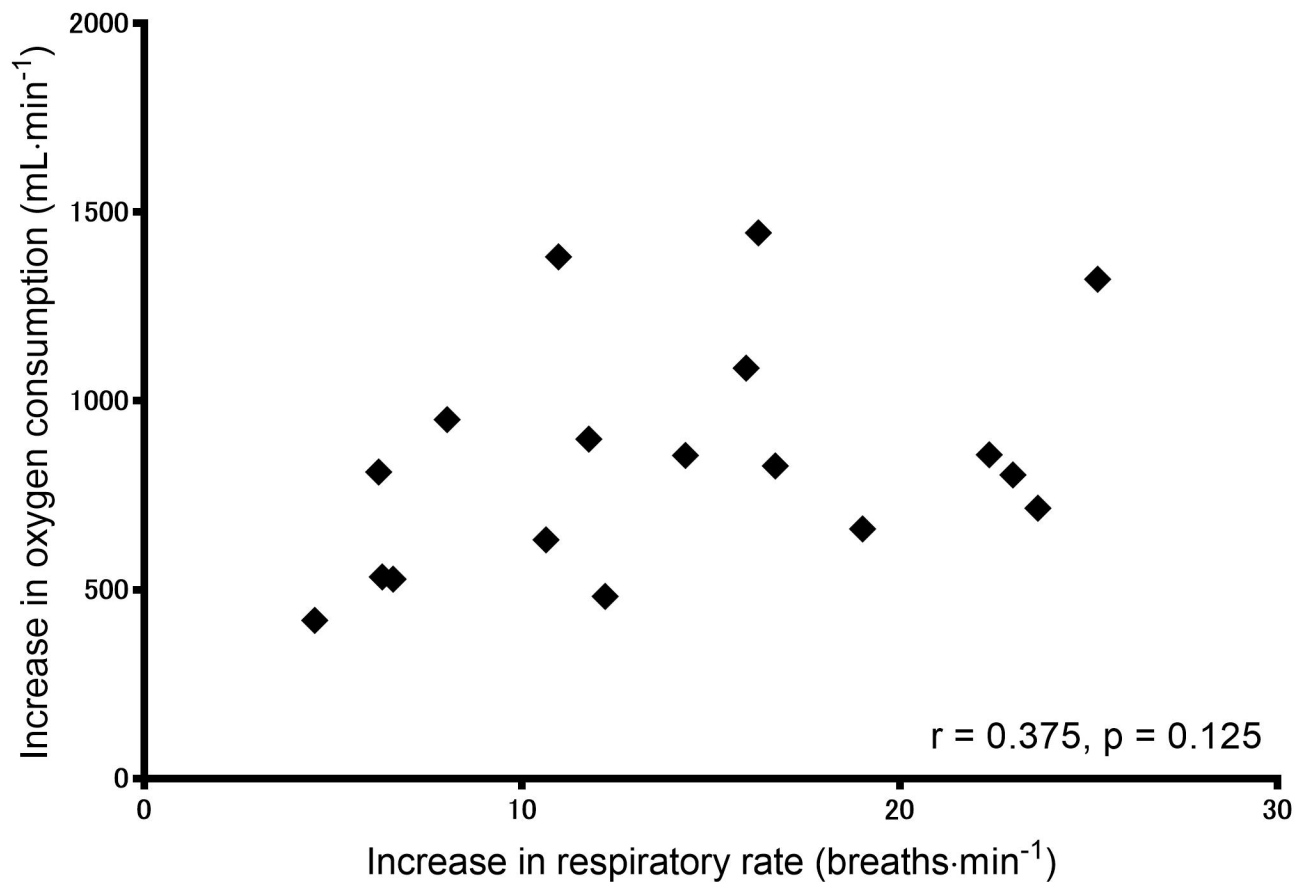

b

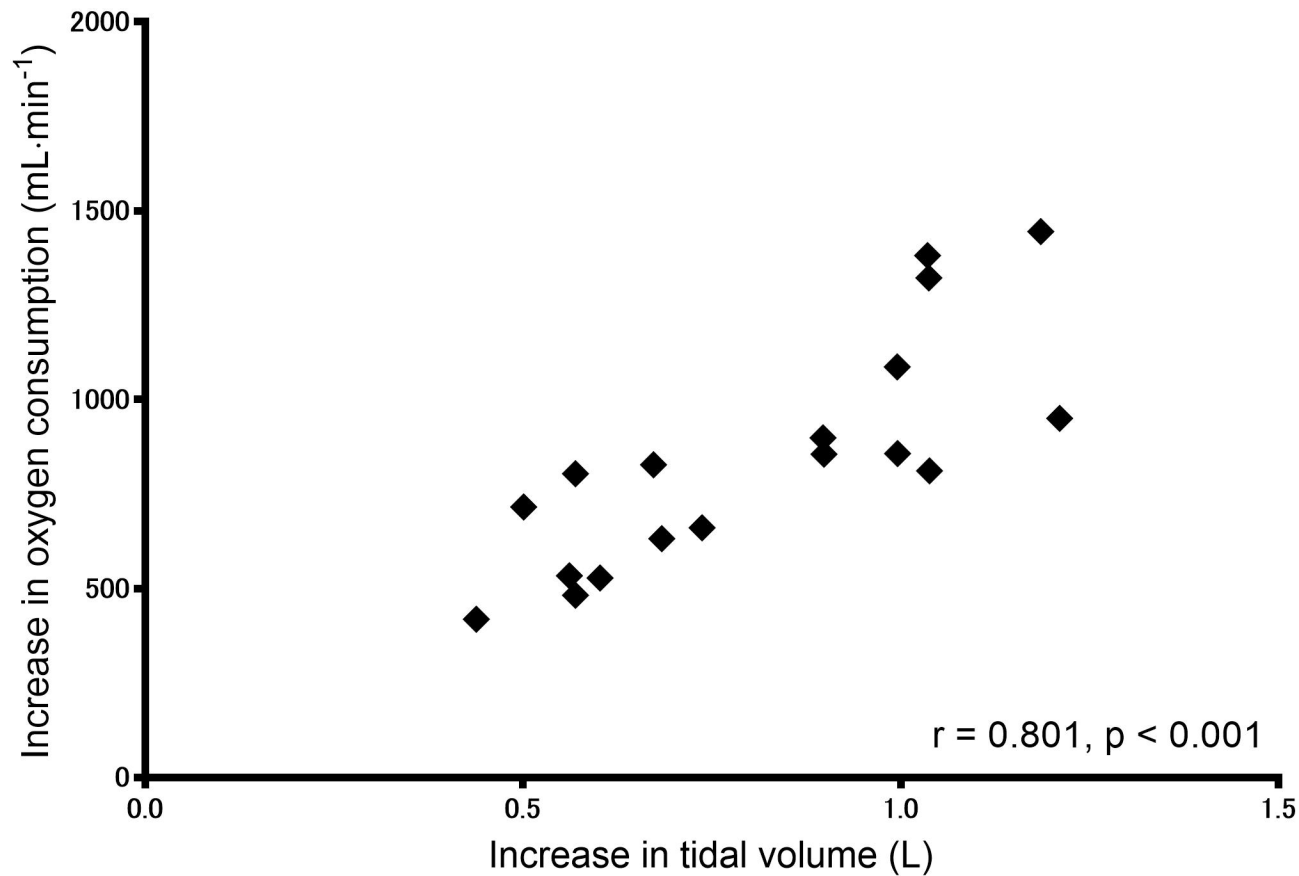

C

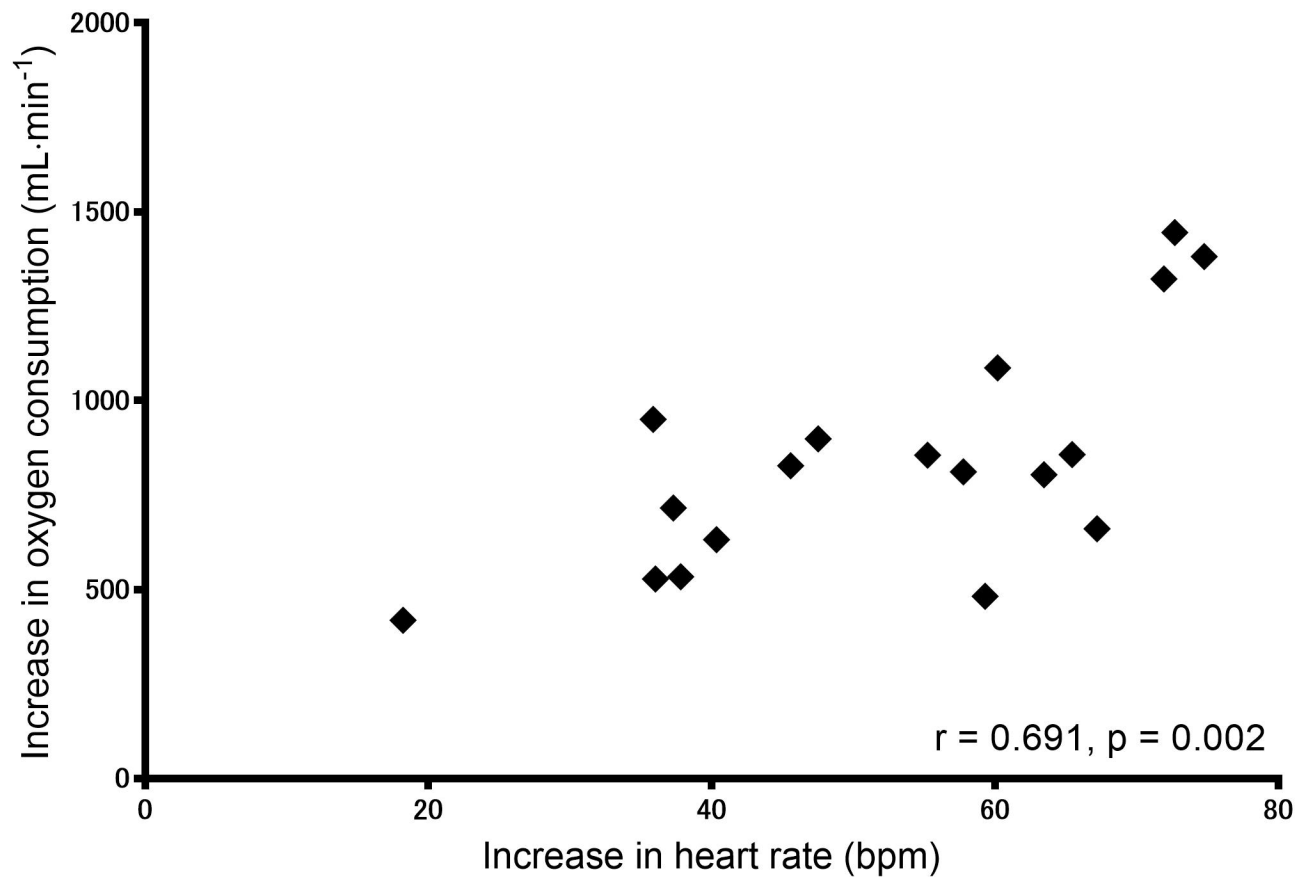

d

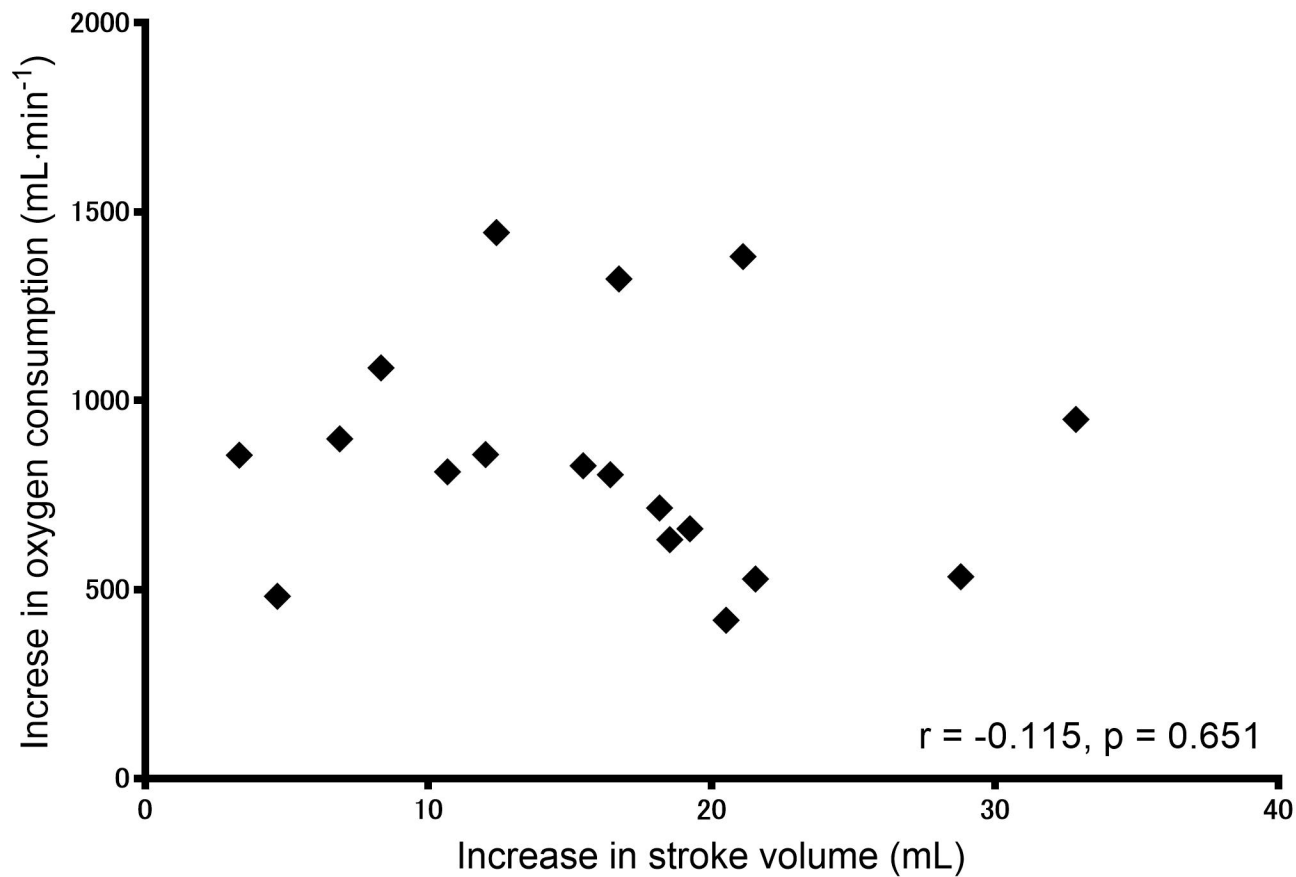

⑥

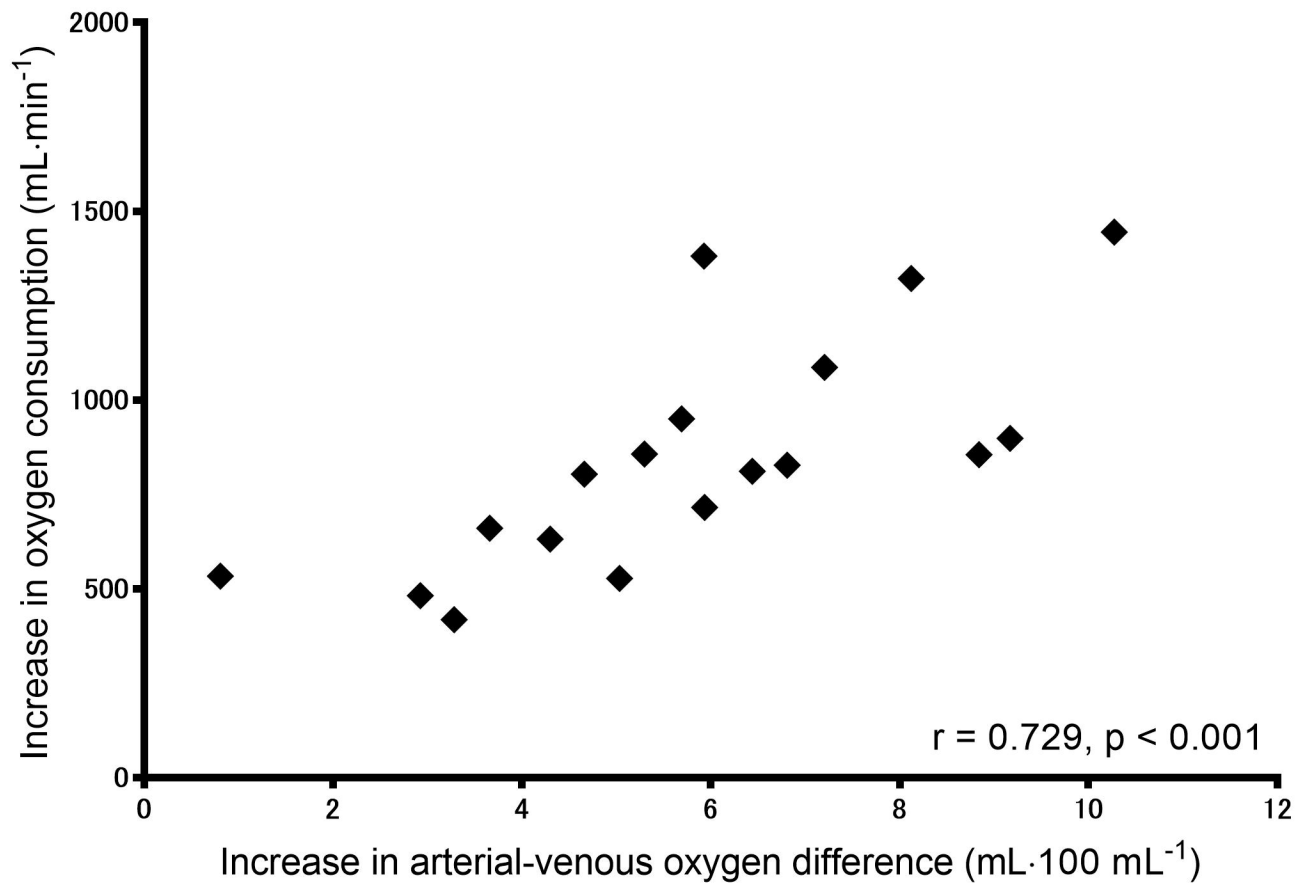

Source: http://biorxiv.org/content/10.1101/641522v1.full.pdf
